# Supplementary material for: Near-infrared imaging for visualizing the synergistic relationship between autophagy and NFS1 protein during multidrug resistance using an ICT–TICT integrated platform
Source: Royal Society of Chemistry journal article supplement (doi:10.1039/d3sc06459j), 2024-01-01
Supplement: d3sc06459j1.pdf [file d3sc06459j1.pdf]

**Near-infrared imaging for visualizing the synergistic relationship between autophagy and NFS1 protein during multidrug resistance using an ICT-TICT integrated platform**

Wei Hu <sup>a, b, c, //</sup>, Yifan He <sup>a, //</sup>, Haixian Ren <sup>b, \*</sup>, Li Chai <sup>b</sup>, Haiyan Li <sup>a</sup>, Jianbin Chen <sup>d</sup>,  
Chunya Li <sup>a, \*</sup>, Yanying Wang <sup>a, \*</sup>, Tony D. James <sup>c, e, \*</sup>

*<sup>a</sup>. Key Laboratory of Catalysis and Energy Materials Chemistry of Ministry of Education & Key Laboratory of Analytical Chemistry of the State Ethnic Affairs Commission, College of Chemistry and Materials Science, South-Central Minzu University, Wuhan 430074, China.*

*<sup>b</sup>. Department of Chemistry, Xinzhou Normal University, Xinzhou, Shanxi, 034000, China.*

*<sup>c</sup>. Department of Chemistry, University of Bath, Bath, BA27AY, United Kingdom.*

*<sup>d</sup>. school of Chemistry and Chemical Engineering, Qilu University of Technology (Shandong Academy of Sciences), Jinan, Shandong 250353 China.*

*<sup>e</sup>. School of Chemistry and Chemical Engineering, Henan Normal University, Xinxiang 453007, China,*

\*Corresponding E-mail address: hxren326@163.com. (H. X. Ren); lichychem@mail.scuec.edu.cn. (C. Y. Li); wangyychem@mail.scuec.edu.cn (Y. Y. Wang) and t.d.james@bath.ac.uk. (T. D. James).

‡ These authors contributed equally to this paper.

**Table of Contents**

1. General Information on Materials and Methods .....3  
    Instruments and materials .....3  
    Spectroscopic measurements .....3  
    Viscosity determination and fluorescence measurements.....4  
    Determination of the detection limit .....4  
    Cell culture and imaging .....4  
    Flow Cytometric Analysis.....4  
2. Synthesis of Vis-H<sub>2</sub>S.....5  
3. Supplementary Figures.....6  
4. Reference.....19

### 1. General Information on Materials and Methods

#### Instruments and materials

Unless otherwise stated, all solvents and reagents were purchased from commercial suppliers and were used as received without further purification. HepG2 cells were obtained from Procell Life Science & Technology Co., Ltd. 3-(4,5-Dimethylthiazol-2-yl)-2,5-diphenyltetrazolium bromide (MTT), Green commercial co-localization dyes (Lyso-Tracker Red for lysosomes, Mito-Tracker Red for mitochondria, and ER-Tracker Red for the endoplasmic reticulum), Rapamycin, N-Ethylmaleimide, 3-Methyladenine, Monenmin, NaSH, Hank's balanced salt solution (HBSS), Malonic, Adriamycin, 2-Acetoxy-1-methoxypropane were purchased from Sigma-Aldrich. All aqueous solutions were prepared by ultrapure water with a resistivity of 18.25 M $\Omega$  cm (purified by Milli-Q system, Millipore). High-resolution mass spectrometry was performed with LTQ FT Ultra (Thermo Fisher Scientific, America) in MALDI-DHB mode. NMR spectra were recorded on a Bruker-400 spectrometer, using TMS as an internal standard. Absorption spectra were recorded with a UV-vis spectrophotometer (Shimadzu UV-2550, Japan), and one-photon fluorescence spectra were obtained with a fluorimeter (Shimadzu RF-6000, Japan). One photon microscopy was performed on a Zeiss LSM 710 multiphoton laser scanning confocal microscope (Carl Zeiss, Germany).

#### Spectroscopic measurements

Unless otherwise mentioned, all the measurements using **Vis-H<sub>2</sub>S** target reaction were tested in PBS buffer (10 mM, pH 7.4, containing 0.9% NaCl)/glycerol system. The excitation wavelengths were 400 nm under one-photon excitation mode, respectively.

The ONOO<sup>-</sup> source was the donor 3-morpholinosydnonimine hydrochloride (SIN-1, 200 mM)<sup>1</sup>. NO was generated in form of 3-(aminopropyl)-1-hydroxy-3-isopropyl-2-oxo-1-triazene (NOC-5, 100  $\mu$ M)<sup>2</sup>. H<sub>2</sub>O<sub>2</sub> was determined at 240 nm ( $\epsilon_{240 \text{ nm}} = 43.6 \text{ M}^{-1}\text{cm}^{-1}$ )<sup>3</sup>. NO<sub>2</sub> was generated from NaNO<sub>2</sub><sup>4</sup>. All the reagents were obtained from Aladdin (USA). All other chemicals were from commercial sources and of analytical reagent grade unless indicated otherwise.

### Viscosity determination and fluorescence measurements

The solvents were obtained by mixing an PBS-glycerol system in different proportions. Measurements were carried out with an NDJ-8S rotational viscometer, and each viscosity value was recorded<sup>5</sup>. The solutions of **Vis-H<sub>2</sub>S** of different viscosity were prepared by adding the stock solution (1.0 mM) 10  $\mu$ L to 1 mL of solvent mixture (PBS-glycerol solvent systems) to obtain the final concentration of **Vis-H<sub>2</sub>S** (10.0  $\mu$ M). These solutions were sonicated for 5 minutes to eliminate air bubbles. After standing for 1 hour at a constant temperature, the solutions were measured in a UV spectrophotometer and a fluorescence spectrophotometer.

### Determination of the detection limit

The limit of detection (LOD) for H<sub>2</sub>O<sub>2</sub> was calculated based on the following equation<sup>6</sup>:

$$\text{LOD} = 3\sigma/k$$

Where  $\sigma$  represents the standard deviation of the blank ( $n = 11$ ) and  $k$  represents the slope of the titration spectra curve among the limited range.

### Cell culture and imaging

HepG2 cells were cultured in Dulbecco's modified Eagle's medium (DMEM, Thermo Scientific) supplemented with 1% penicillin/streptomycin and 10% fetal bovine serum (FBS), and incubated in an atmosphere of 5/95 (v/v) of CO<sub>2</sub>/air at 37 °C. Two days before imaging, the cells were passed and placed into glass-bottomed dishes (NEST). For labeling, the cells were washed with serum-free DMEM and then incubated with 10  $\mu$ M **Vis-H<sub>2</sub>S** (containing 1% DMSO) for 30 min at 37 °C.

### Flow Cytometric Analysis

The HepG2 cells were cultured at  $1.0 \times 10^6$  cells/well in 6-well plates, and then treated with different concentration of NaHSO<sub>3</sub> as described in the paper. After harvesting, cells were washed and suspended in fresh complete medium. 5  $\mu$ L AnnexinV-FITC was mixed, then add 5  $\mu$ L PI mix and analyzed by flow cytometry.

## 2. Synthesis of Vis-H<sub>2</sub>S

Compound **1** was synthesized according to our previously reported method.<sup>7</sup>

Synthesis of compound **2**. 2,4-diformylphenyl acetate (384.1 mg, 2 mmol), sodium acetate (541.6 mg, 3.98 mmol), 693.4 mg (3.98 mmol) of compound **1** and 10 mL of acetic anhydride in a 50 mL round bottom flask, heated at 80 °C for 30 min under nitrogen. After the reaction, the solvent was evaporated under reduced pressure. The residue was washed with distilled water, dried, and separated by silica gel column chromatography with dichloromethane/methanol (10/1, V/V) as eluent. 273.6 mg of compound **2** was obtained (679.2 mg, yield: 45%). <sup>1</sup>H NMR (400 MHz, DMSO-*d*<sub>6</sub>) δ 7.94 (dd, *J* = 14.6, 2.6 Hz, 2H), 7.73 (d, *J* = 1.9 Hz, 1H), 7.70 (d, *J* = 14.7 Hz, 1H), 7.67 – 7.62 (m, 3H), 7.61 – 7.56 (m, 3H), 7.53 – 7.48 (m, 4H), 7.19 (d, *J* = 8.6 Hz, 1H), 4.23 (s, 6H), 2.31 (s, 3H), 1.70 (s, 12H).

Synthesis of **Vis-H<sub>2</sub>S**. O-Iodobenzoic acid (16.3 mg, 0.066 mmol) was dissolved in dichloromethane, *N, N*-dicyclohexylcarbodiimide (16.3 mg, 0.079 mmol) and 4-dimethylaminopyridine (0.81 mg, 0.006 mmol) were added in an ice bath. and after stirring for 30 minutes, compound **2** (50 mg, 0.066 mmol) was added, and the mixture was stirred at room temperature overnight. The reaction progress was determined by TLC. After the reaction was complete, the product was purified by silica gel column chromatography (40.6 mg, yield: 65%). <sup>1</sup>H NMR (400 MHz, DMSO-*d*<sub>6</sub>) δ 8.02 (dd, *J* = 7.5, 1.6 Hz, 1H), 7.94 (dd, *J* = 14.6, 2.8 Hz, 2H), 7.80 (dd, *J* = 7.5, 1.5 Hz, 1H), 7.76 (d, *J* = 1.9 Hz, 1H), 7.67 – 7.56 (m, 6H), 7.54 – 7.44 (m, 6H), 7.37 (td, *J* = 7.4, 1.5 Hz, 1H), 7.24 (td, *J* = 7.4, 1.5 Hz, 1H), 4.23 (s, 6H), 1.70 (s, 12H). <sup>13</sup>C NMR (100 MHz, DMSO-*d*<sub>6</sub>) δ 167.74, 164.79, 164.27, 150.01, 148.17, 145.92, 145.89, 141.05, 141.00, 140.23, 132.08, 131.82, 131.28, 131.19, 131.16, 129.69, 128.57, 128.33, 128.27, 128.20, 127.26, 126.81, 126.70, 125.16, 125.14, 121.17, 120.62, 119.23, 117.51, 117.50, 98.46, 54.46, 54.44, 36.52, 36.50, 27.11, 27.09, 27.07. [M]<sup>2+</sup> calcd for [C<sub>39</sub>H<sub>37</sub>N<sub>2</sub>O<sub>2</sub>I] 346.0944, found 346.1209.

## 3. Supplementary Figures

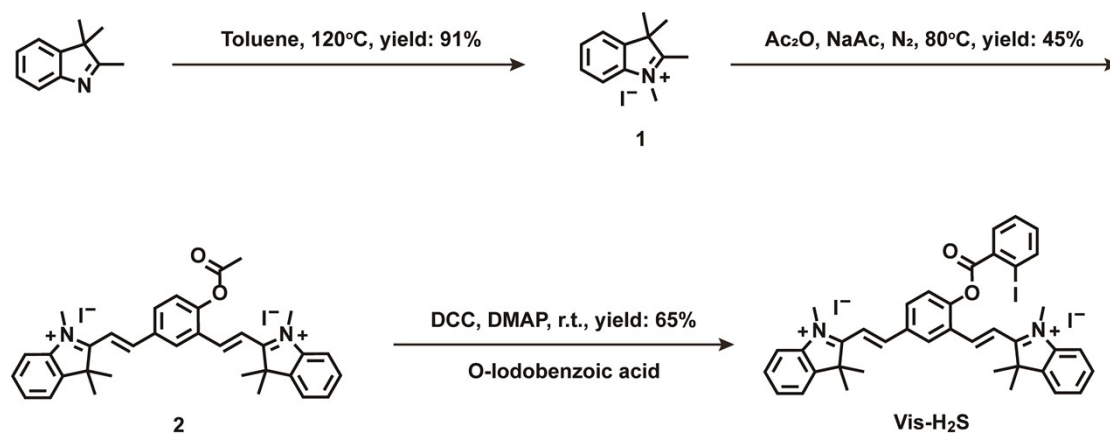Scheme S1. Synthetic procedure for Vis-H<sub>2</sub>S.

# Supporting Information

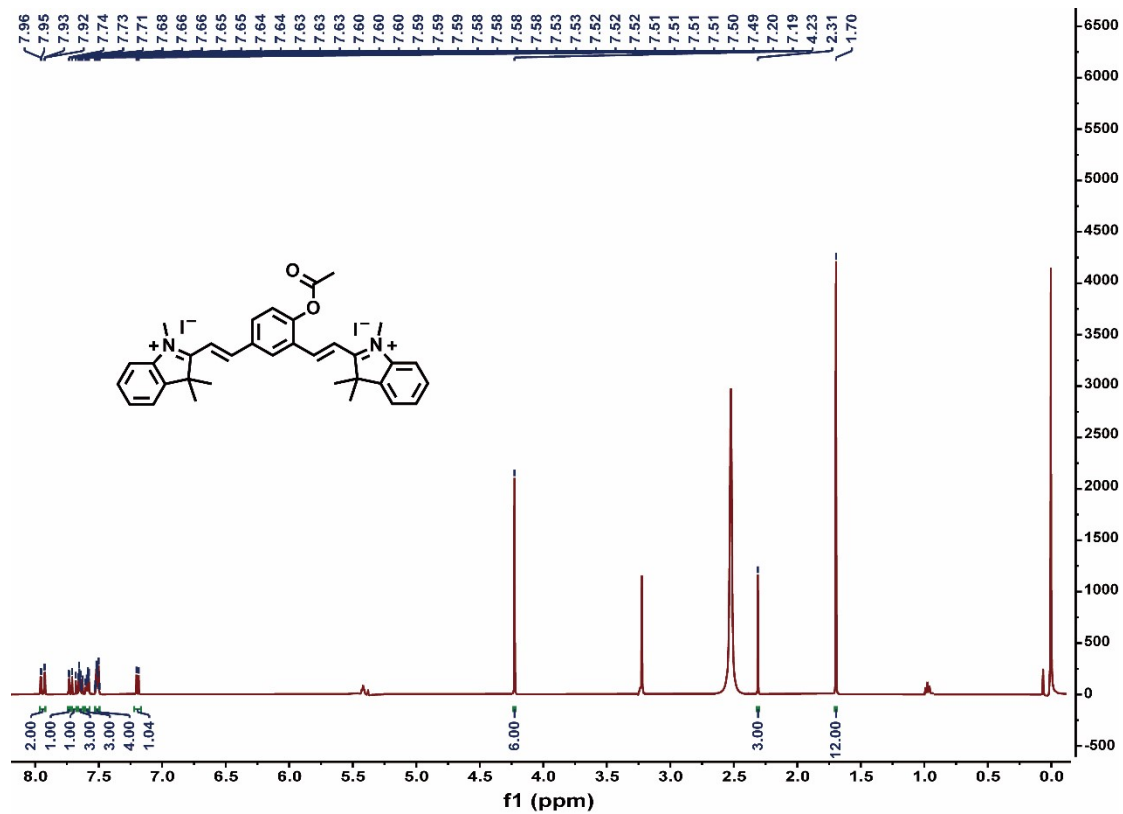

**Figure S1.**  $^1\text{H}$  NMR spectrum of Compound 2 (DMSO- $d_6$ ).

# Supporting Information

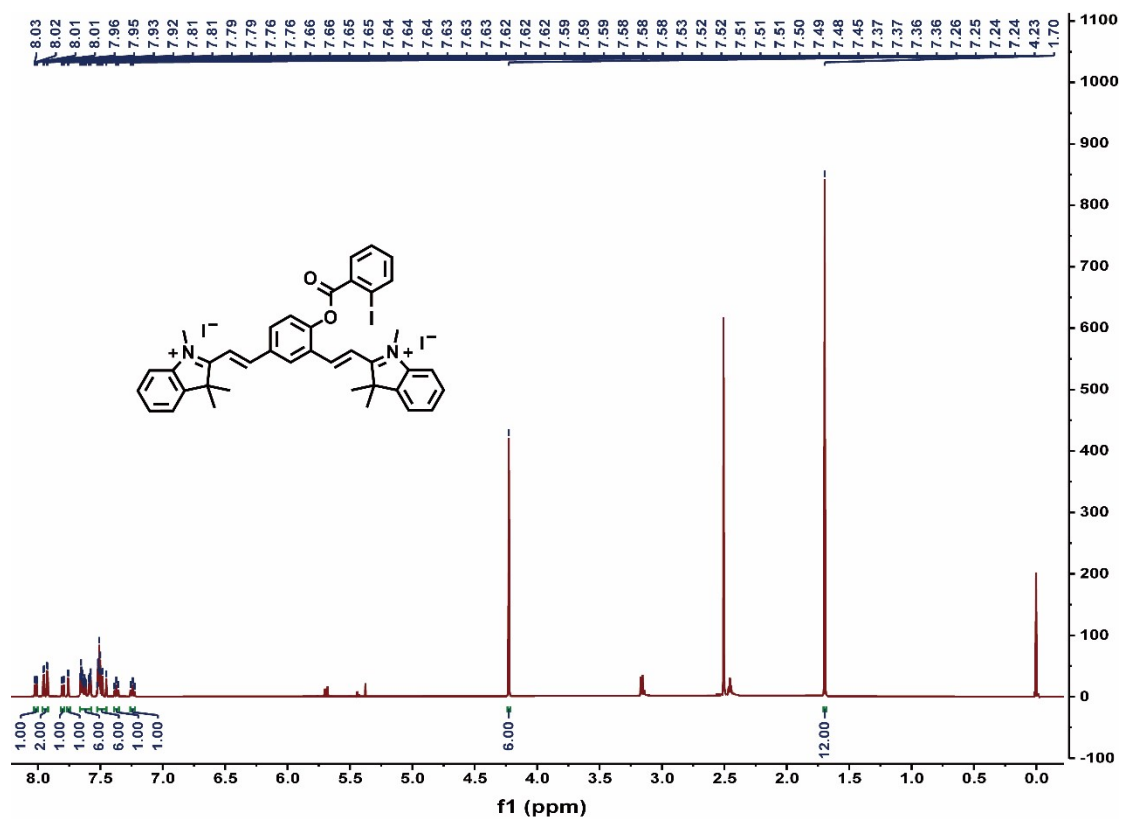

**Figure S2.**  $^1\text{H}$  NMR spectrum of Vis- $\text{H}_2\text{S}$  ( $\text{DMSO-}d_6$ ).



## Supporting Information

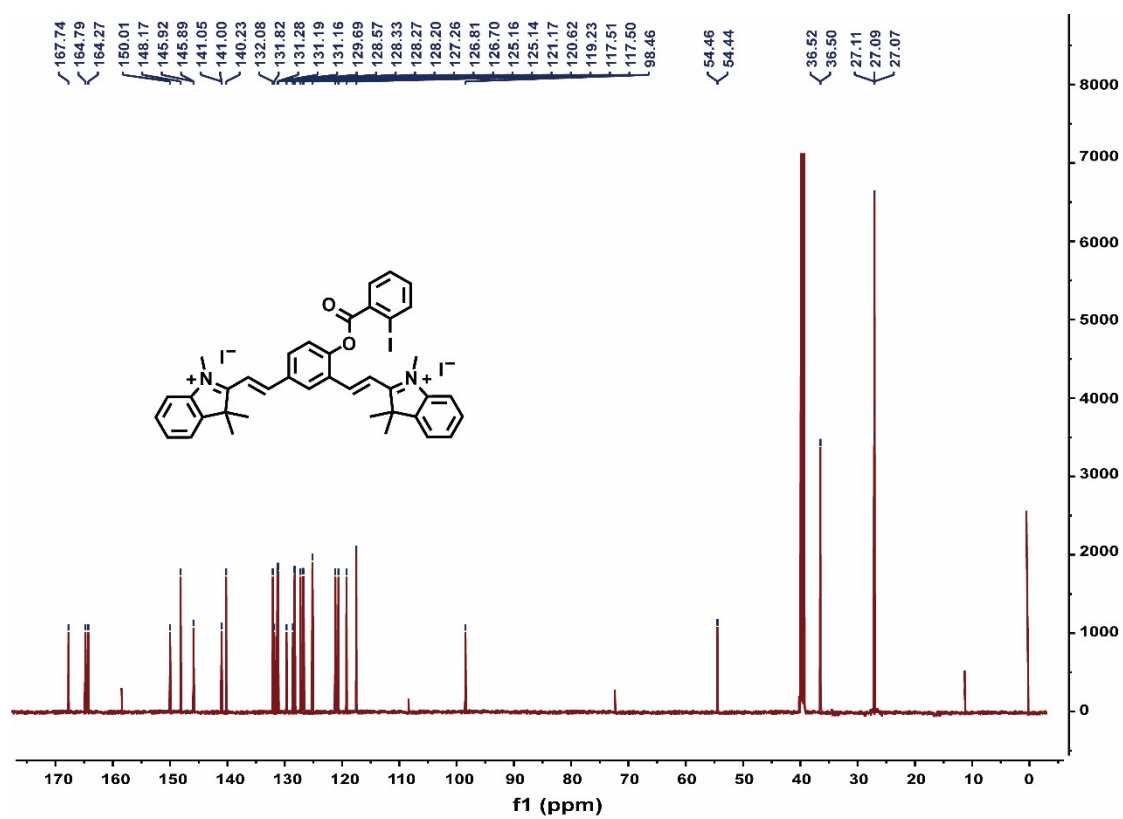

**Figure S3.**  $^{13}\text{C}$  NMR spectrum of Vis- $\text{H}_2\text{S}$  ( $\text{DMSO-}d_6$ ).

# Supporting Information

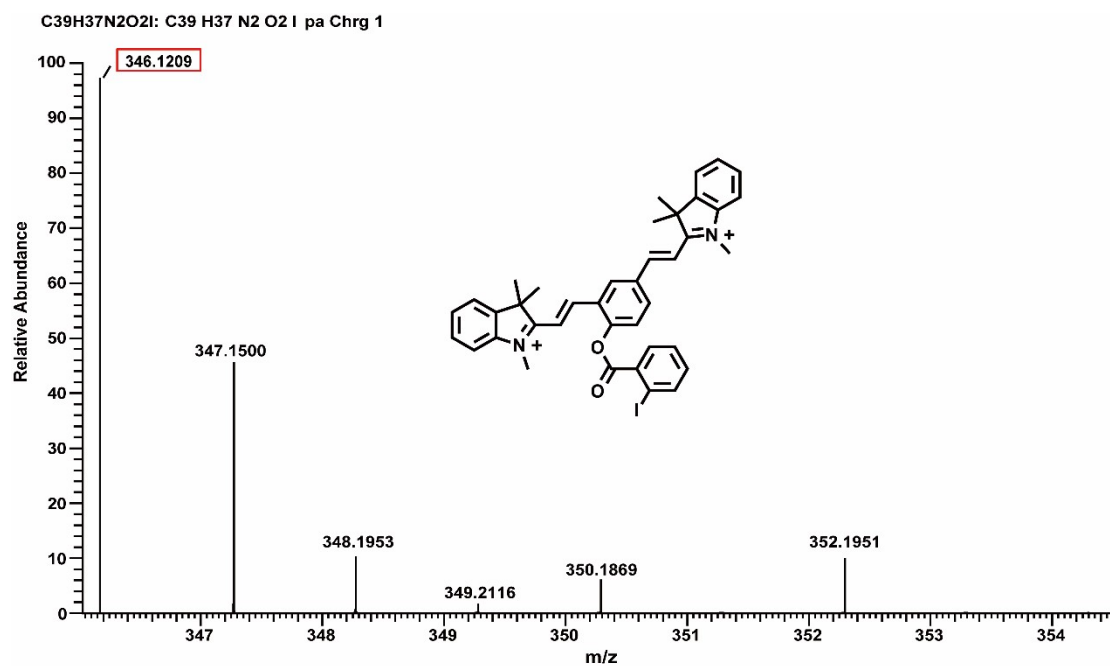

**Figure S4.** HRMS spectrum of Vis-H<sub>2</sub>S.

## Supporting Information

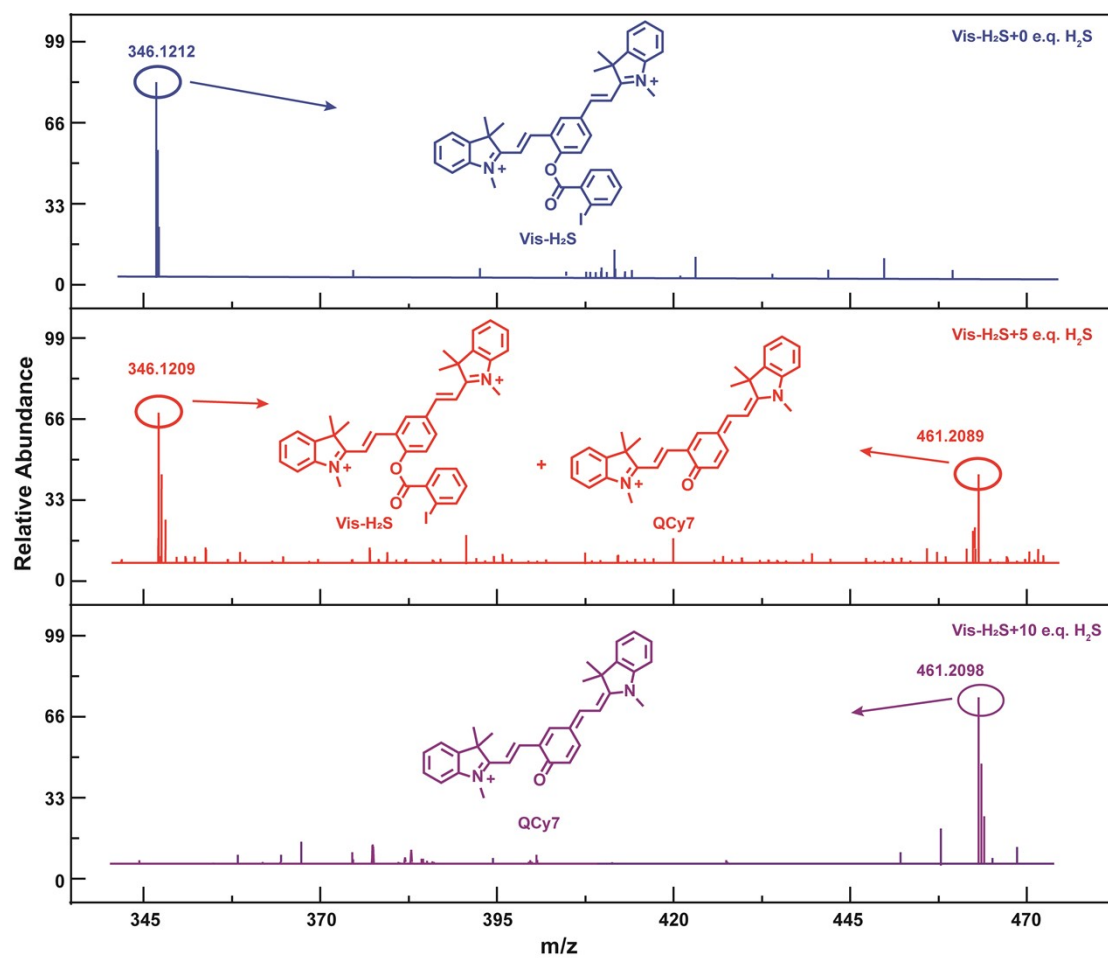

**Figure S5.** HRMS spectrum of Vis-H<sub>2</sub>S with H<sub>2</sub>S.

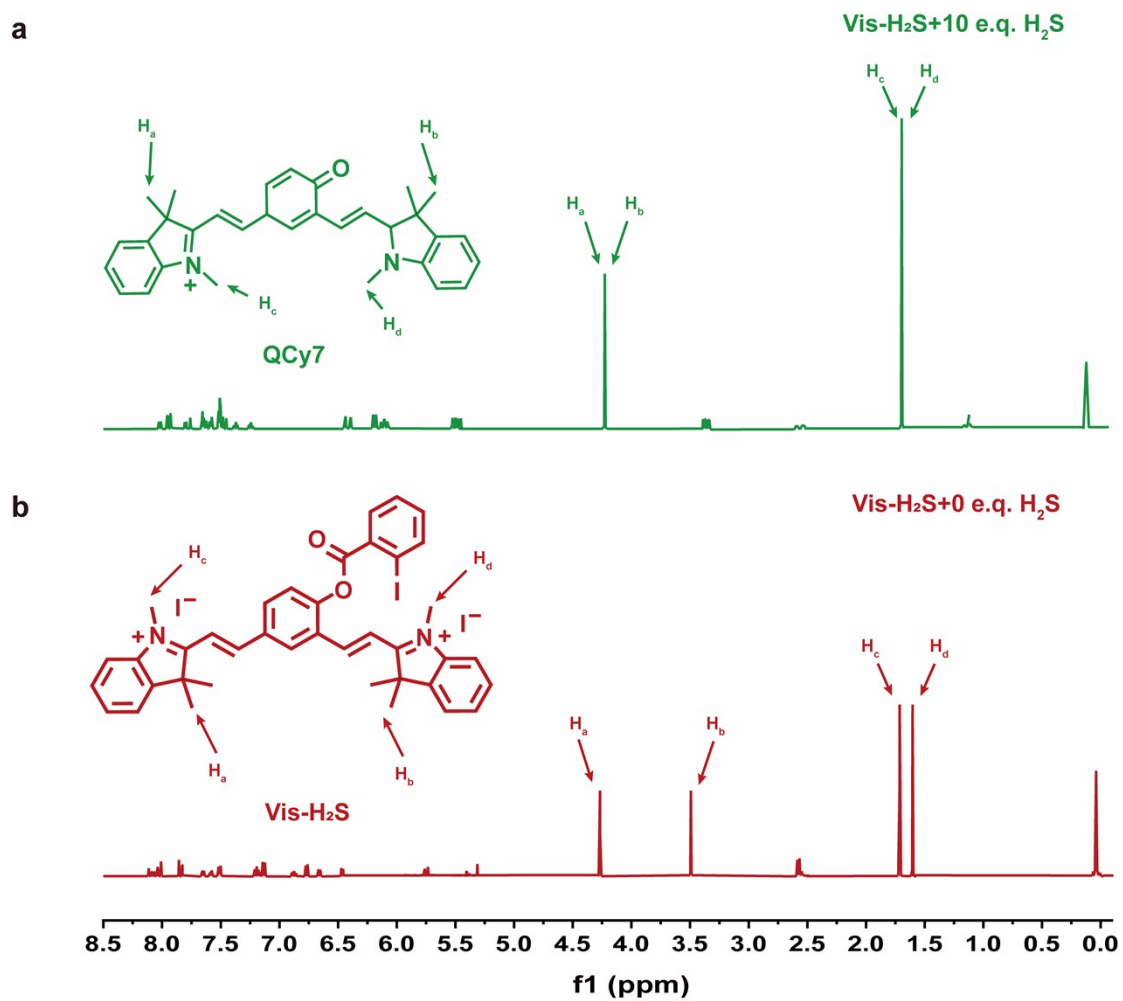

**Figure S6.** <sup>1</sup>H NMR spectrum of Vis-H<sub>2</sub>S with H<sub>2</sub>S.

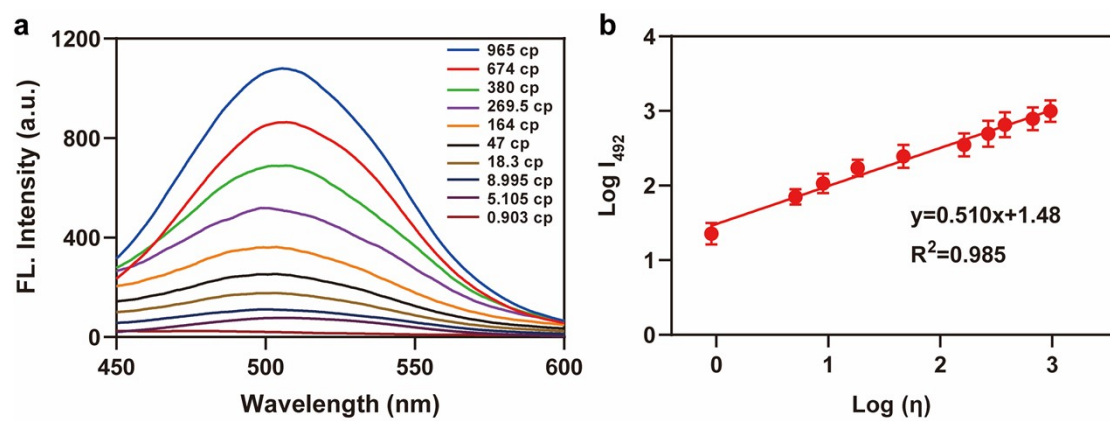

**Figure S7.** a) Fluorescence spectra of **Vis-H<sub>2</sub>S** viscosity response; b) Linear relationship between the relative fluorescence intensity of the probe and the viscosity; Excitation wavelength: 400 nm; Emission wavelength: 450 nm-600 nm.

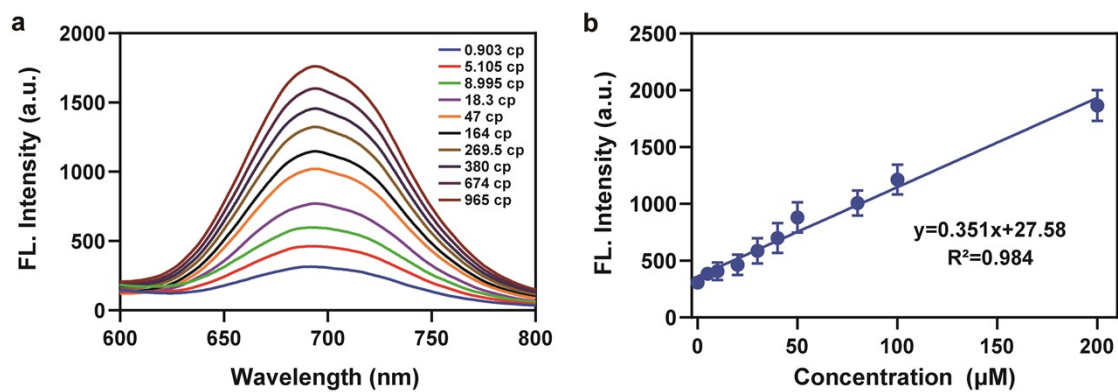

**Figure S8.** a) Fluorescence spectra of QCy7 viscosity response; b) Linear relationship between the relative fluorescence intensity of the probe and the viscosity; Excitation wavelength: 400 nm; Emission wavelength: 600 nm-800 nm.

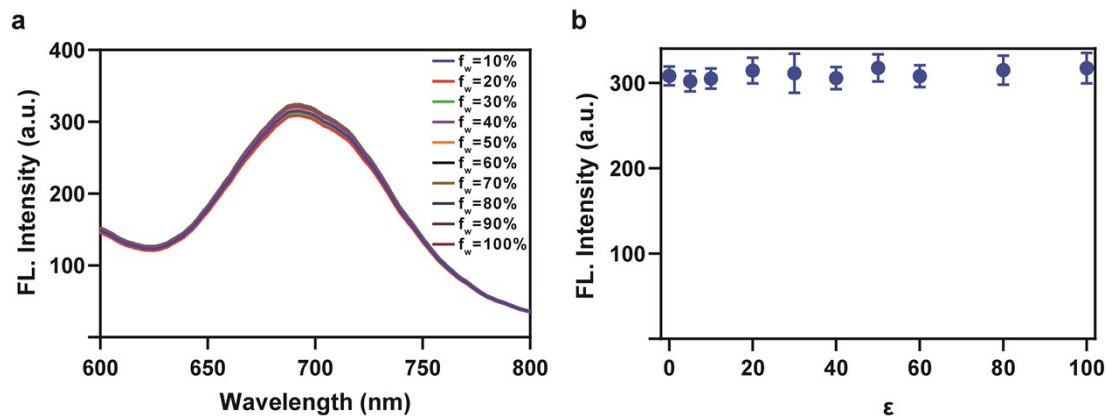

**Figure S9.** a) Fluorescence spectra of **QCy7** in THF/PBS mixtures with different volume fractions ( $f_w$ ) of PBS; b) Plot of the fluorescence intensity of **QCy7** ( $\lambda_{em} = 687$  nm) versus the dielectric constant ( $\epsilon$ ) of the solvent; Excitation wavelength: 400 nm; Emission wavelength: 600 nm-800 nm.

## Supporting Information

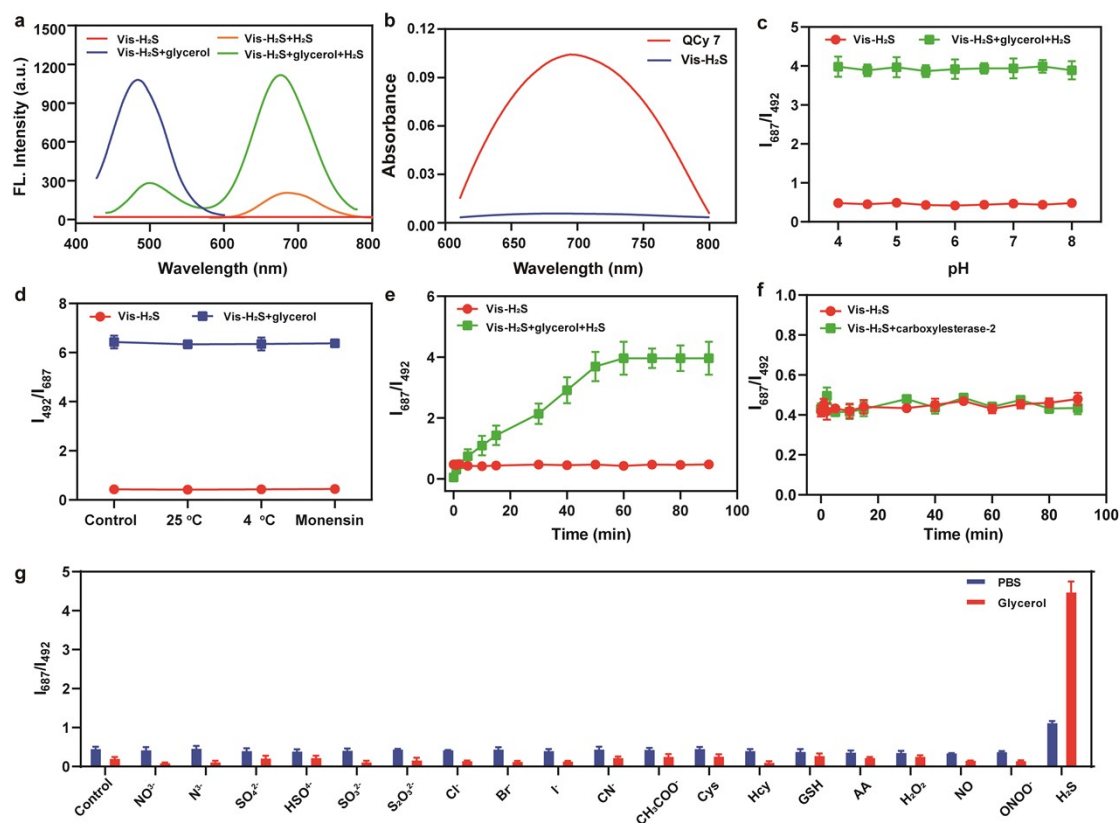

**Figure S10.** a) Fluorescence spectra of **Vis-H<sub>2</sub>S** (10 μM) in response to H<sub>2</sub>S and viscosity; b) Absorption spectra of **Vis-H<sub>2</sub>S** (10 μM) and **QCy7** (10 μM); c) Under different pH conditions, the fluorescence intensity changes of **Vis-H<sub>2</sub>S** before and after the reaction with H<sub>2</sub>S (10 μM) and H<sub>2</sub>S (200 μM)+70% glycerol; d) viscosity stability test after changing the aqueous solution environment; e) Time response of **Vis-H<sub>2</sub>S** to H<sub>2</sub>S (10 μM) and H<sub>2</sub>S (200 μM)+70% glycerol; f) Photostability of the **Vis-H<sub>2</sub>S** in the presence of carboxylesterase-2 (0.50 μg/mL); g) fluorescence histogram of the reaction of **Vis-H<sub>2</sub>S** with different analytes.



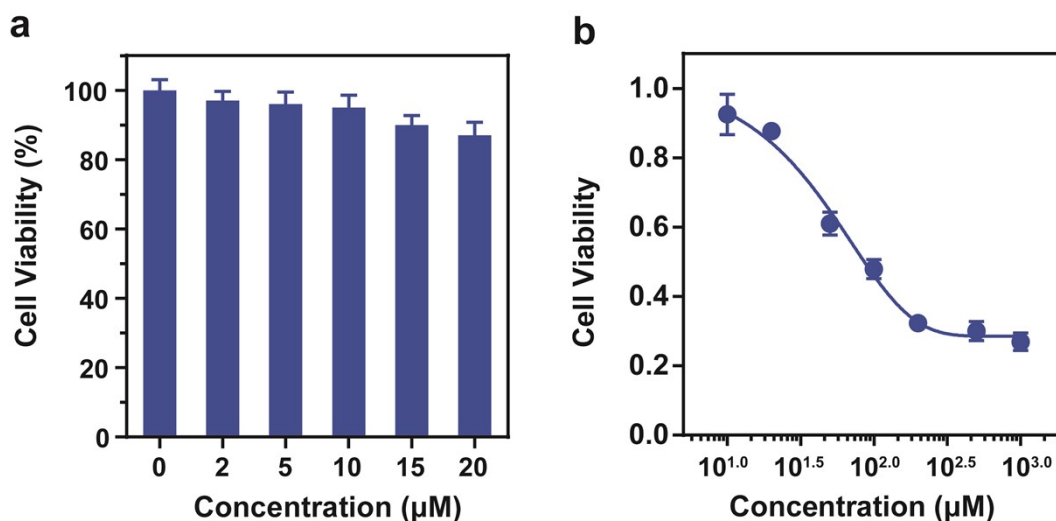

**Figure S11.** a) Viability of HepG2 cells was assessed by MTT assay following exposure to various concentrations of Vis-H<sub>2</sub>S (0, 2, 5, 10, 15, 20 µM). Results are presented as the mean of triplicate measurements with error bars indicating standard deviation (SD). b) Inhibitory Concentration (IC<sub>50</sub>) Determination for Vis-H<sub>2</sub>S in HepG2 Cells. The inhibitory concentration (IC<sub>50</sub>) of Vis-H<sub>2</sub>S was determined over a concentration range of 10-1000 µM in HepG2 cells. The IC<sub>50</sub> value, representing the concentration at which Vis-H<sub>2</sub>S inhibits 50% of cell viability, was calculated. Each data point is the mean of three replicates, and error bars indicate the standard deviation (SD).

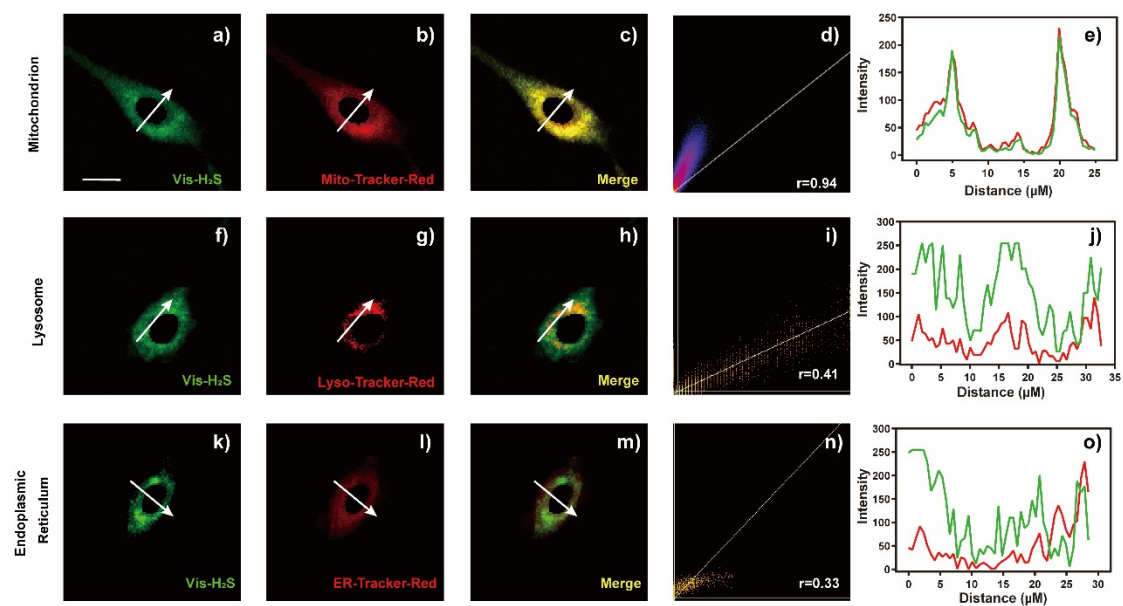

**Figure S12.** Confocal microscopy images of cells with **Vis-H<sub>2</sub>S** (5  $\mu\text{M}$ ) and (a–c) Mito-Tracker Red, (f–h) Lyso-Tracker Red, and (k–m) ER-Tracker Red. (d, i, n) Fluorescence intensity correlation plot of **Vis-H<sub>2</sub>S** and commercial dyes. Scale bar: 50  $\mu\text{m}$ . (e, j, o) Fluorescence intensity profile of the region of interest across cells in the red and green channels.

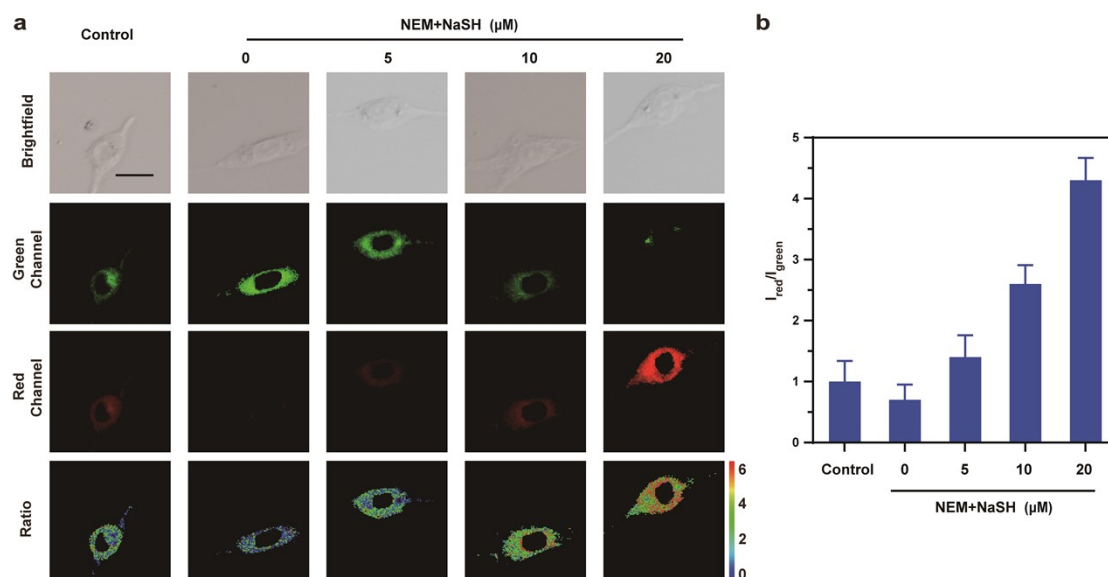

**Figure S13.** a) Confocal imaging of **Vis-H<sub>2</sub>S** response to H<sub>2</sub>S. In the control group, HepG2 cells were treated with **Vis-H<sub>2</sub>S** (10  $\mu$ M); in the other groups, HepG2 cells were first treated with NEM (0.5 mM) and then with different concentrations (0, 5, 10, 20  $\mu$ M) of NaSH, and then the probe added. Confocal images of **Vis-H<sub>2</sub>S** (10  $\mu$ M) incubation; b) Ratio fluorescence intensity (ratio= $I_{red}/I_{green}$ ). Light collection range: green channel 450-520 nm, red channel 650-720 nm, excitation light source is 552 nm, scale bar is 20  $\mu$ m.

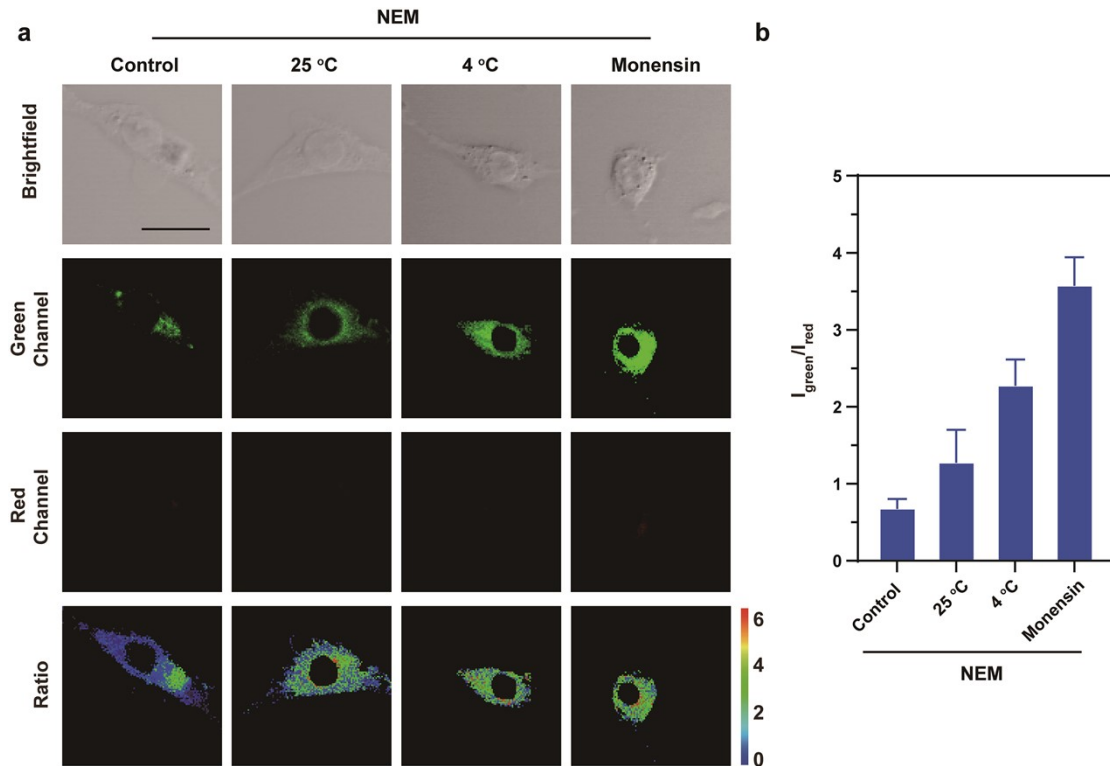

**Figure S14.** a) Confocal imaging of the viscosity response of **Vis-H<sub>2</sub>S**. The image of the control group HepG2 cells treated with **Vis-H<sub>2</sub>S** (10  $\mu$ M) + NEM (0.5 mM); In the other groups, HepG2 cells were first treated with 4 °C + NEM (0.5 mM), 25 °C + NEM (0.5 mM), and monensin (10  $\mu$ M) + NEM (0.5 mM), respectively, and then treated with probes. Confocal images of **Vis-H<sub>2</sub>S** (10  $\mu$ M) incubation; b) Ratio fluorescence intensity (ratio =  $I_{\text{green}}/I_{\text{red}}$ ). Light collection range: green channel 450-520 nm, red channel 650-720 nm, excitation light source is 552 nm, scale bar is 20  $\mu$ m.

## Supporting Information

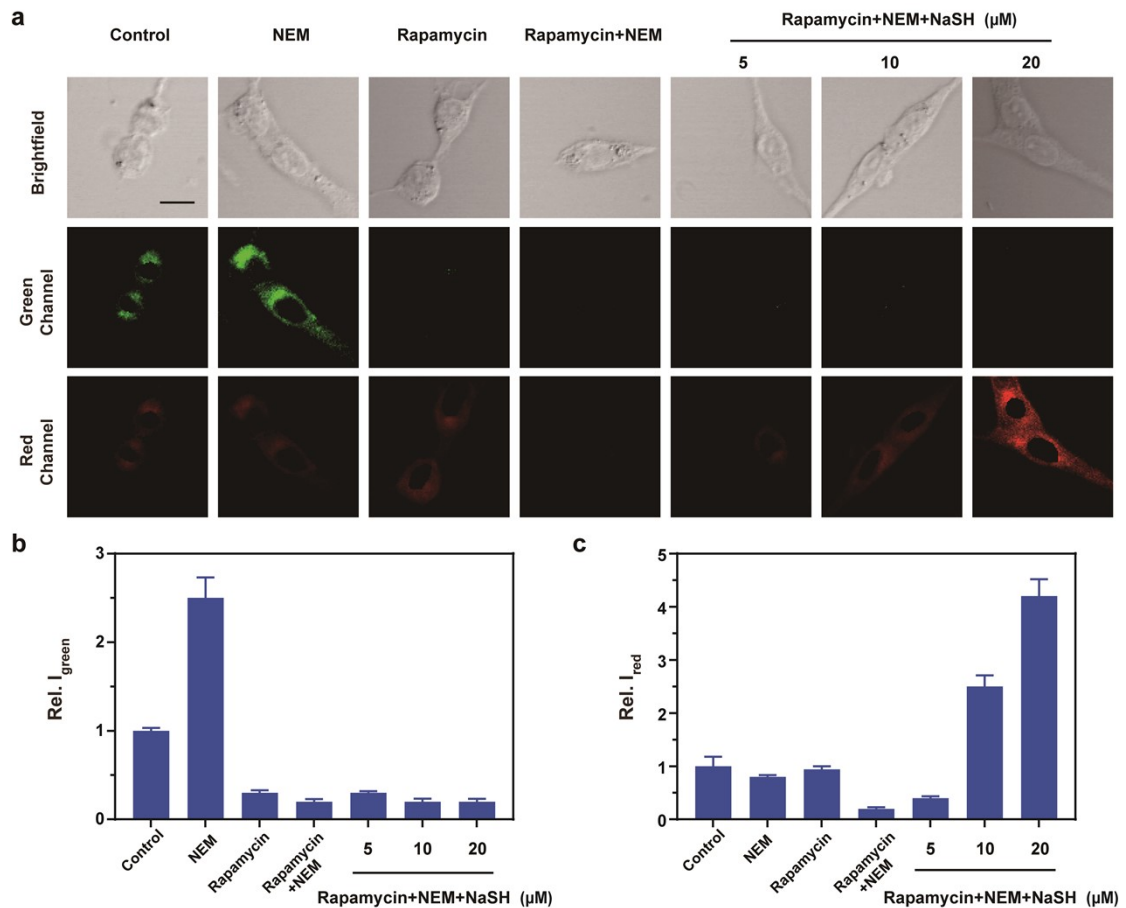

**Figure S15.** a) Confocal imaging of **Vis-H<sub>2</sub>S** response to H<sub>2</sub>S and viscosity. The image of the control group HepG2 cells treated with **Vis-H<sub>2</sub>S** (10  $\mu\text{M}$ ); The other groups were treated with NEM (0.5 mM), Rapamycin (5  $\mu\text{M}$ ), NEM (0.5 mM) + Rapamycin (5  $\mu\text{M}$ ), NEM (0.5 mM) + Rapamycin (5  $\mu\text{M}$ ) + NaSH (5, 10, 20  $\mu\text{M}$ ) treatment followed by incubation with **Vis-H<sub>2</sub>S** (10  $\mu\text{M}$ ). b) Histogram of relative fluorescence intensity of green channel. c) Histogram of relative fluorescence intensity of red channel. Light collection range: green channel 450-520 nm, red channel 650-720 nm, excitation light source is 552 nm, scale bar is 20  $\mu\text{m}$

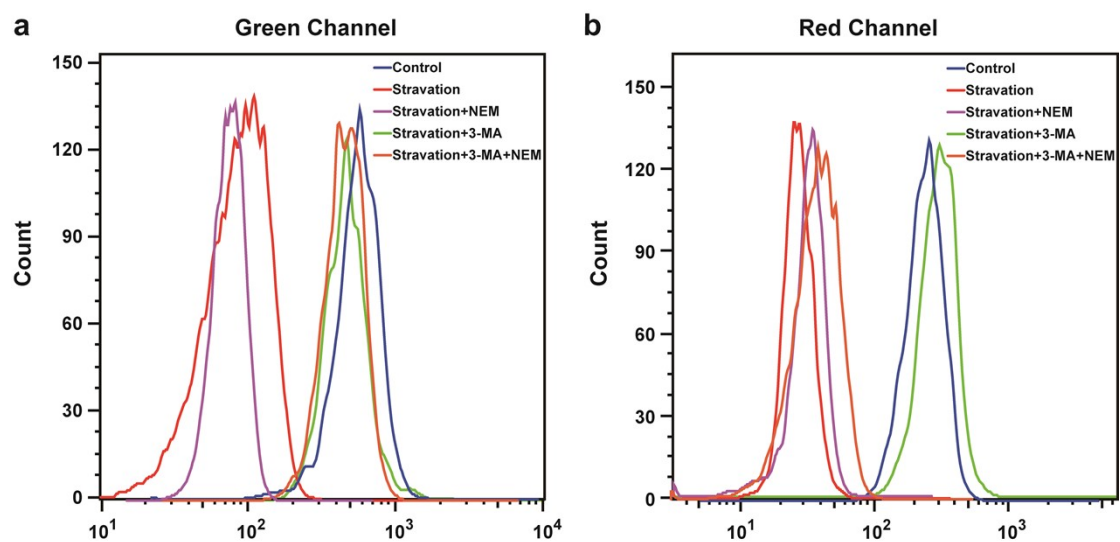

**Figure S16.** Flow cytometric analysis of fluorescence intensity in the green channel a) and red channel b). The cells used for this analysis are from the same source as depicted in Figure 2.

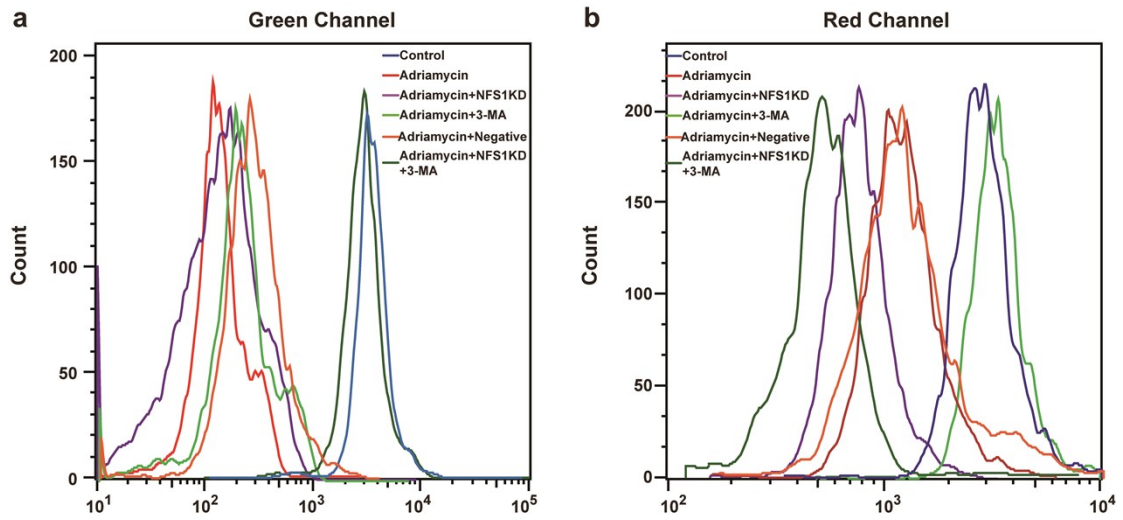

**Figure S17.** Flow cytometric analysis of fluorescence intensity in the green channel a) and red channel b). The cells used for this analysis are from the same source as depicted in Figure 3.

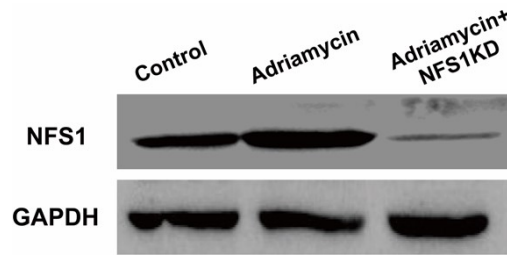

**Figure S18.** Western blotting illustrating the expression of cysteine desulfurase (NFS1) of the HepG2 cells in Control group, Adriamycin group and Adriamycin (5  $\mu$ M) after NFS1 knockout (Adriamycin+ NFS1KD) group.



#### 4. Reference

- 1 R. Q. Li, Z. Q. Mao, L. Rong, N. Wu, Q. Lei, J. Y. Zhu, L. Zhuang, X. Z. Hang and Z. H. Liu, *Biosens. Bioelectron.*, 2017, **87**, 73-80.
- 2 L. Y. Zeng, T. Xia, W. Hu, S. Y. Chen, S. Y. Chi, Y. D. Lei and Z. H. Liu, *Anal. Chem.*, 2018, **90**, 1317-1324.
- 3 X. T. Jia, Q. Q. Chen, Y. F. Yang, Y. Tang, R. Wang, Y. F. Xu, W. P. Zhu and X. H. Qian, *J. Am. Chem. Soc.*, 2016, **138**, 10778-10781.
- 4 Z. Q. Mao, W. Q. Feng, Z. Li, L. Y. Zeng, W. J. Lv and Z. H. Liu, *Chem. Sci.*, 2016, **7**, 5230-5235.
- 5 F. Cheng, T. T. Qiang, L. F. Ren, T. Y. Liang, X. Y. Gao, B. S. Wang and W. Hu, *Analyst.*, 2021, **146**, 2632-2637.
- 6 M. T. Ye, W. Hu, M. He, C. C. Li, S. Y. Zhai, Z. H. Liu, Y. Y. Wang, H. J. Zhang and C. Y. Li, *Chem. Commun.*, 2020, **56**, 6233-6236.
- 7 Y. F. He, W. Hu, L. Chai, Y. Y. Wang, X. Wang, T. Liang, H. Y. Li and C. Y. Li, *Chem. Commun.*, 2022, **58**, 7301-7304.
